# Supplementary material
Source: PubMed Central journal article supplement (PMC2974828)

*Supplemental Information for*

**HOW SEQUENCE DIRECTS BENDING IN TROPOMYOSIN  
AND OTHER TWO-STRANDED ALPHA-HELICAL COILED COILS**

Jerry H. Brown

*Rosenstiel Basic Medical Sciences Research Center, Brandeis University, Waltham, MA 02454-*

*9110*

tel: 781-736-2495; FAX: 781-736-2419; e-mail: [jhbrown@brandeis.edu](mailto:jhbrown@brandeis.edu)

*running title: Direction of Bends in Alpha-Helical Coiled Coils*

## **Supplemental Figure Legends**

Supplemental Figure S1 Legend: The magnitude of bends of the coiled-coil axis in many locations of tropomyosin is relatively variable between different crystal environments (see main text). Scatter plot shown here is similar to that of figure 2 in the main text (see legend) except x-axis here shows the magnitude of the bends. The overall sample standard deviation for the magnitudes of all the bends in this plot is  $1.52^\circ$ . The composite sample standard deviation, based on the 23 bends from eight locations that show bending in two or more crystal environments (see main text), is  $0.88^\circ$ , yielding a variability index of 0.58. Excluding the two largest outliers, the composite sample standard deviation is  $0.75^\circ$ , yielding a variability index of 0.49. (See main text for definitions.)

Supplemental Figure S2 Legend: The correlation of change in axial stagger with the magnitude of bends (especially for those directed nearly within the local plane of the dimer) in parallel homodimeric alpha-helical coiled coils suggests that change in axial stagger (such as a junction between axially staggered and in-register regions) promotes specific local bends. Both parameters are in  $\text{\AA}$ . (See figure 3 and other sections of main text for definitions and for results on direction of bending.)

Supplemental Figure S3 Legend: The correlation of gap volume<sup>1</sup> with the magnitude of bends in parallel homodimeric alpha-helical coiled coils suggests that poorly packed cores promote local bending. Magnitude of bending is in degrees and gap volume is in  $\text{\AA}^3$ . (See figure 4 and other

sections of main text for definitions and for results on direction of bending.) Note that the occurrence of poorly packed cores in the regions of bends appear to be consistent with an analysis of these structures with SOCKET<sup>2</sup>: only 42 of the 117 (15-residue-long) structures centered about the bends have the expected minimum of two pairs of well-packed type 4 knobs-into-holes interactions.

Supplemental Figure S4 Legend: Nearly all large bends ( $>6.5^\circ$  in magnitude) in parallel homodimeric alpha-helical coiled coils are directed closer to out of the local dimeric plane than to within the local dimeric plane. (See main text)

## **Supplemental Tables**

Supplemental Table S1: Geometry of Bends of the Coiled-Coil Axis: Conventions Used

| Fully-signed Value of Direction Of Bend Angle (°) | Direction of Bending Relative to an Observer | Direction of Bending Relative to the Local Dimeric Plane |
|---------------------------------------------------|----------------------------------------------|----------------------------------------------------------|
| 0                                                 | left                                         | in-plane towards chain1                                  |
| +45                                               | left/up                                      |                                                          |
| +90                                               | up                                           | out-of-plane                                             |
| +135                                              | right/up                                     |                                                          |
| +180 /-180                                        | right                                        | in-plane towards chain2                                  |
| -135                                              | right/down                                   |                                                          |
| -90                                               | down                                         | out-of plane                                             |
| -45                                               | left/down                                    |                                                          |

Supplemental Table S1 legend: The descriptions in the “Direction of Bending Relative to an Observer” column (left, right, up, down) are based on the observer looking from the dimer axis at residue i-n (typically i-7) towards the dimer axis at residue i while the molecule is oriented so that the chain1 axis at residue i is directly to the left of the dimer axis. Refer to Figure 1 in the main text.

Supplemental Table S2 : List of Tropomyosin Structures examined

| Pdb code | Chains      | Residues included | Reference    |
|----------|-------------|-------------------|--------------|
| 1ic2     | AB          | 10-68             | <sup>3</sup> |
| 1ic2     | CD          | 10-68             | <sup>3</sup> |
| 2b9c     | AB          | 107-200           | <sup>4</sup> |
| 2d3e     | AB          | 184-259           | <sup>5</sup> |
| 1kql     | AB          | none              | <sup>6</sup> |
| 2z5h     | AB,CD,EF,GH | 261-272           | <sup>7</sup> |
| 2z5i     | AB,CD       | 261-272           | <sup>7</sup> |
| 2efs     | AB          | 183-266           | <sup>8</sup> |
| 2efs     | CD          | 183-266           | <sup>8</sup> |
| 2efr     | AB          | 183-266           | <sup>8</sup> |
| 2efr     | CD          | 183-266           | <sup>8</sup> |

Supplemental Table S3 : List of Non-tropomyosin Alpha-Helical Coiled Coils Examined

| PDB i.d.                      | Chains | Residues Scanned |
|-------------------------------|--------|------------------|
|                               |        |                  |
| <i>Leucine zippers</i>        |        |                  |
| 2zta, 2ahp                    | AB     | 1-31             |
| 1zik, 1zil                    | AB     | 1-30             |
| 1pyI                          | AB     | 76-94            |
| 1zme                          | CD     | 72-98            |
| 1hwt                          | CD, GH | 107-128          |
| 2hap                          | CD     | 107-128          |
| 1qp9                          | AB, CD | 107-128          |
| 1gd2                          | EF, GH | 101-139          |
| 1gu4 , 1gtw, 1h8A ,1h88 ,1hjb | AB     | 296-332          |
| 1hjb                          | DE     | 296-332          |
| 1io4                          | AB     | 296-331          |
| 1nwq                          | AC     | 307-340          |
| 2c9l, 2c9n                    | YZ     | 197-222          |
|                               |        |                  |
| <i>Myosin Rod</i>             |        |                  |
| 1nkn                          | AB, CD | 846-917          |
| 3bas                          | AB     | 840-917          |
| 3bat                          | AB     | 843-917          |

|                           |        |           |
|---------------------------|--------|-----------|
| 3bat                      | CD     | 840-917   |
| 2fxm                      | AB     | 850-961   |
| 2fxo                      | AB, CD | 843-961   |
|                           |        |           |
| <i>Other Coiled Coils</i> |        |           |
| 1dkg                      | AB     | 39-87     |
| 1d7m                      | AB     | 243-343   |
| 1deb                      | AB     | 5-44      |
| 1joc                      | AB     | 1289-1341 |
| 1no4                      | AB, CD | 37-71     |
| 1noh                      | AB, CD | 37-71     |
| 1uix                      | AB     | 979-1044  |
| 1slc                      | XY     | 950-1013  |
| 1x79                      | BC     | 555-585   |
| 1tu3                      | FG, HI | 806-834   |
| 1T6F                      | AB     | 1-37      |
| 1uii                      | AB     | 94-150    |
| 2gzd                      | CD     | 468-487   |
| 2d7c                      | CD     | 716-741   |
| 2hv8                      | EF     | 716-741   |
| 2ocy                      | AB     | 14-162    |

## Supplemental References

- 1 Reynolds C, Damerell D, Jones S. (2009). ProtorP: a protein-protein interaction analysis server. *Bioinformatics* 25:413-4.
- 2 Walshaw J, Woolfson DN. (2001). Socket: a program for identifying and analysing coiled-coil motifs within protein structures. *J Mol Biol* 307:1427-50.
- 3 Brown JH, Kim K-H, Jun G, Greenfield NJ, Dominguez R, Volkman N, Hitchcock-DeGregori SE, Cohen C. (2001). Deciphering the design of the tropomyosin molecule. *Proc. Natl Acad. Sci. USA* 98:8496-8501.
- 4 Brown JH, Zhou Z, Reshetnikova L, Robinson H, Yammani RD, Tobacman LS, Cohen C. (2005). Structure of the mid-region of tropomyosin: bending and binding sites for actin. *Proc Natl Acad Sci U S A* 102:18878-83.
- 5 Nitanaï Y, Minakata S, Maeda K, Oda N, Maeda Y. (2007). Crystal structures of tropomyosin: flexible coiled-coil. *Adv Exp Med Biol* 592:137-51.
- 6 Li Y, Mui S, Brown JH, Strand J, Reshetnikova L, Tobacman LS, Cohen C. (2002). The crystal structure of the C-terminal fragment of striated-muscle alpha-tropomyosin reveals a key troponin T recognition site. *Proc. Natl Acad. Sci. USA* 99:7378-83.
- 7 Murakami K, Stewart M, Nozawa K, Tomii K, Kudou N, Igarashi N, Shirakihara Y, Wakatsuki S, Yasunaga T, Wakabayashi T. (2008). Structural basis for tropomyosin overlap in thin (actin) filaments and the generation of a molecular swivel by troponin-T. *Proc Natl Acad Sci U S A* 105:7200-5.
- 8 Minakata S, Maeda K, Oda N, Wakabayashi K, Nitanaï Y, Maeda Y. (2008). Two-crystal structures of tropomyosin C-terminal fragment 176-273: exposure of the hydrophobic core to the solvent destabilizes the tropomyosin molecule. *Biophys J* 95:710-9.



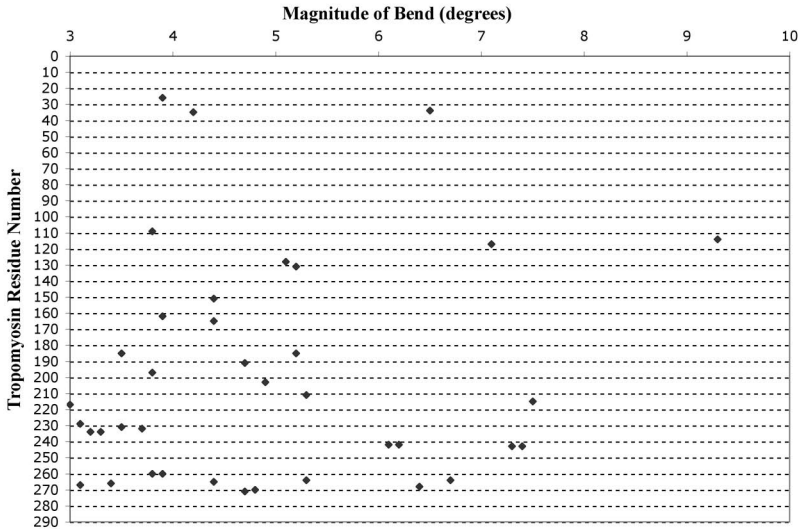

**Absolute Value of Change in Axial Stagger ( $\text{\AA}$  per heptad)**

### Parallel Homodimer Coiled Coils (all bends)

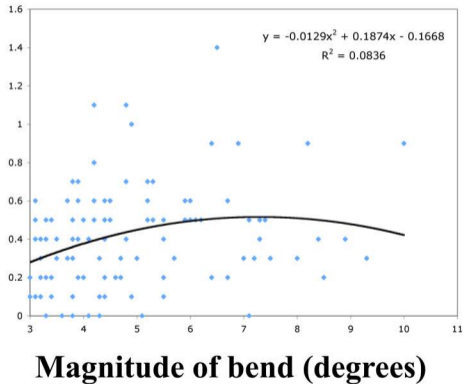

### Parallel Homodimeric Coiled Coils (only bends within 45 degrees of in-plane)

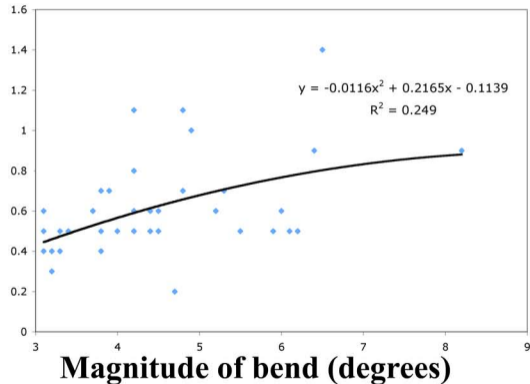

# All Parallel Homodimeric Coiled Coils

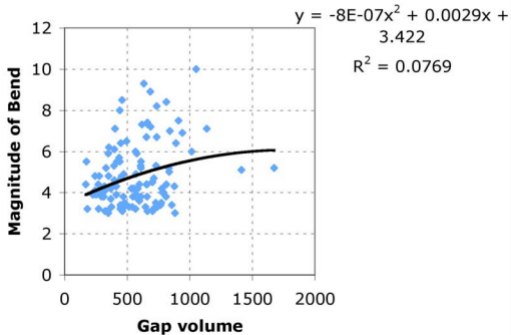

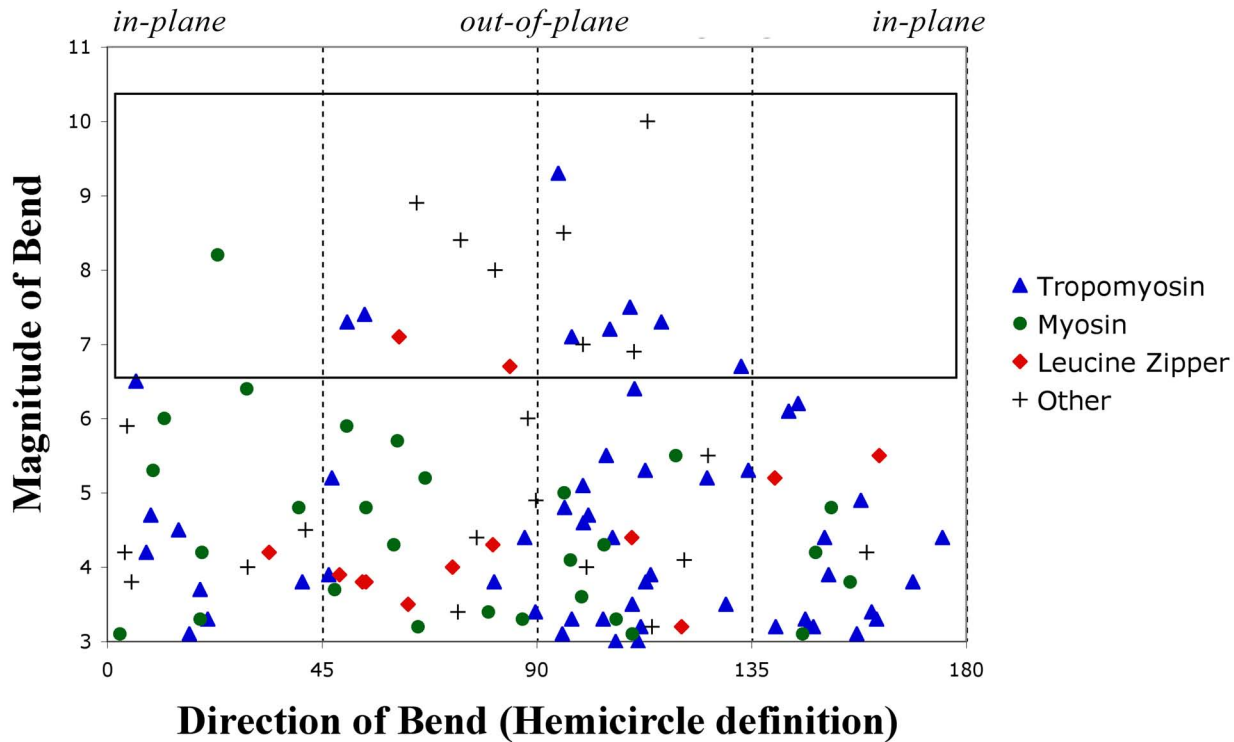

Supplement: pro0019-1366-SD1.pdf [file pro0019-1366-SD1.pdf]
